# 1 Membranous Nephropathy in the UK Biobank

2

3 \*Patrick Hamilton<sup>1,2,3</sup>, \*Kieran Blaikie<sup>1,4</sup>, Stephen A. Roberts<sup>1,4</sup>, Matthew Gittins<sup>1,4</sup>, Mallory L. Downie<sup>5</sup>,  
4 Sanjana Gupta<sup>5</sup>, Catalin Voinescu<sup>5</sup>, Durga Kanigicherla<sup>1,3</sup>, Horia Stanescu<sup>5</sup>, Robert Kleta<sup>5</sup>, Paul Brenchley<sup>1,3</sup>

5 1 Manchester Academic Health Science Centre (MAHSC), The University of Manchester, 46 Grafton  
6 Street, Manchester, M13 9NT

7 2 Wellcome Centre for Cell-Matrix Research, Division of Cell Matrix Biology and Regenerative  
8 Medicine, School of Biological Sciences, Faculty of Biology Medicine and Health, The University of  
9 Manchester, Oxford Road, M13 9PL

10 3 Manchester Institute of Nephrology and Transplantation, Manchester Royal Infirmary, Oxford  
11 Road, Manchester, M13 9WL

12 4 Centre for Biostatistics, The University of Manchester, Oxford Road, M13 9PL

13 5 UCL Department of Renal Medicine, UCL Medical School, Rowland Hill Street, London, NW3 2PF

14

15

16 \*Joint first author

17

18 Corresponding Author

19 Dr Patrick Hamilton

20 [patrick.hamilton@manchester.ac.uk](mailto:patrick.hamilton@manchester.ac.uk)

21

22

23

24

## 25 Abstract

26 Background: Despite MN being one of the most common causes of nephrotic syndrome worldwide, its biological  
27 and environmental determinants are poorly understood in large-part due to it being a rare disease. Making use  
28 of the UK Biobank, a unique resource holding a clinical dataset and stored DNA, serum and urine for ~500,000  
29 participants, this study aims to address this gap in understanding.

30 Methods: The primary outcome was putative MN as defined by ICD-10 codes occurring in the UK Biobank.  
31 Univariate relative risk regression modelling was used to assess the associations between the incidence of MN  
32 and related phenotypes with sociodemographic, environmental exposures, and previously described increased-  
33 risk SNPs.

34 Results: 502,507 patients were included in the study of whom 100 were found to have a putative diagnosis of  
35 MN; 36 at baseline and 64 during the follow-up. Prevalence at baseline and last follow-up were 72 and 199  
36 cases/million respectively. At baseline, as expected, the majority of those previously diagnosed with MN had  
37 proteinuria, and there was already evidence of proteinuria in patients diagnosed within the first 5 years of  
38 follow-up. The highest incidence rate for MN in patients was seen in those homozygous for the high-risk alleles  
39 (9.9/100,000 person-years).

40 Conclusion: It is feasible to putatively identify patients with MN in the UK Biobank and cases are still  
41 accumulating. This study shows the chronicity of disease with proteinuria present years before diagnosis.  
42 Genetics plays an important role in disease pathogenesis, with the at-risk group providing a potential population  
43 for recall.

44

## 45 Keywords

46 Membranous Nephropathy; UK Biobank; Nephrotic Syndrome; Genetics

47

48

## 49 Introduction

50 Membranous nephropathy (MN) is among the most common causes of adult nephrotic syndrome worldwide  
51 and has a significant healthcare burden, despite being a rare disease (10-12 cases per million)<sup>1</sup>. For the majority  
52 of patients, it is an autoimmune disease associated with the anti-phospholipase M-type receptor autoantibody  
53 (anti-PLA<sub>2</sub>R); a highly sensitive biomarker and seemingly pathogenic factor in its own right<sup>2,3</sup>. There appears to  
54 be a strong genetic contribution to the condition, with the possession of single-nucleotide polymorphisms (SNPs)  
55 at *PLA2R1* and the Major Histocompatibility Complex, Class II, DQA1 (*HLA-DQA1*) conferring a dramatically  
56 increased risk of developing the disease<sup>4-6</sup>. The most recent GWAS has also shown two further loci associated  
57 with disease risk in *NKFB1* and *IRF4*<sup>6</sup>. However, given its rarity, understanding not only the disease pathogenesis  
58 but also the risk of disease onset has been challenging. Why some patients with the genetic predisposition  
59 develop a pathogenic antibody whilst others do not, has still not been elicited. Circumstantial evidence suggests  
60 there may be a role for the loss of tolerance. As with other autoimmune conditions, the presence of the disease  
61 associated risk SNPs are unlikely to be solely responsible for the evolution of the disease. An accompanying  
62 trigger, be it environmental or pathogenic, at the correct time, is needed to initiate the immune cascade leading  
63 to symptoms. The podocyte antigen peptide sequence shows similarities to a cell wall enzyme in certain  
64 commonly encountered pathogens such as *Clostridia* species<sup>7</sup>. One study from China suggests a potential  
65 environmental trigger by identifying an association between air pollution and MN compared to other  
66 autoimmune glomerulopathies<sup>8,9</sup>.

67 The UK Biobank holds a clinical dataset and stored deoxyribonucleic acid (DNA), serum and urine for over  
68 500,000 participants, aged between 40-70 years old, recruited from across the United Kingdom from 2007-2010.  
69 This age profile corresponds to the age of onset of MN with a mean of 54 years. DNA has been genotyped on a  
70 genome-wide microarray with subsequent imputation.

71 Further health record data has been linked through the Hospital Episode Statistics (HES) and cancer and  
72 mortality statistics<sup>10</sup>. Participant place of birth, residential area and occupation are all recorded, providing an  
73 invaluable resource for the study of environmental and occupational pollution exposures<sup>11-14</sup>. With the deep  
74 phenotyping of each participant, life-long follow-up, genotyping and health record linkage, the UK Biobank  
75 provides a unique and powerful tool to help understand the epidemiology of rare diseases such as MN. An initial

76 step in the use of the UK Biobank is its validation as a tool for accurately identifying patients with MN. Neither  
77 International Classification of Disease tenth edition (ICD-10) nor UK Read codes (a coding system for clinical  
78 terms used in the UK) have an explicit code for MN, but both coding systems have codes that will include MN  
79 plus potentially several other diagnoses.

80 Here, for the first time, we have used the UK Biobank to demonstrate its feasibility and to investigate the genesis  
81 of the rare kidney disease, MN.

82

83 The specific study aims were:

- 84 a) to provide a detailed description of the numbers of participants with confirmed or possible MN  
85 within the UK Biobank to inform the identification of participants for further phenotyping and  
86 sampling or recall for assessments
- 87 b) to determine the prevalence and incidence rates of MN in this population
- 88 c) to stratify the UK Biobank population by the genetic risk of MN
- 89 d) to assess the feasibility of linking environmental factors (infection and occupational exposure) to  
90 triggering of autoimmunity in this genetically susceptible cohort

91

92

## 93 Methods

94 This is a cohort study in which the primary outcome was putative Membranous nephropathy (MN), defined as  
95 any primary or secondary HES inpatient diagnosis of ICD-10 N02.2, N03.2, N04.2, or N05.2 occurring before the  
96 UK Biobank HES data refresh in March 2019. The nominal diagnosis date was taken as the earliest such record.  
97 This did not include self-reported diagnoses at the time of UK Biobank entry, or clinical diagnoses not resulting  
98 in hospital admission, which are not fully available in the Biobank dataset.

99 Primary care attendance data in the UK is provided by multiple separate entities, with which UK Biobank is  
100 working to allow for data linkage. At present, a subset of 228,957 UK Biobank participants had clinical  
101 attendances in primary care<sup>11–13</sup>. For these records putative MN was defined as the equivalent Read codes  
102 version 2 (READ2) K0A22, K0A32, K021., K011, K016., K031. or READ3 codes K0A22, K021., K011., K016., K031.

103 Our descriptive study examined multiple exposures including sociodemographic characteristics and medical  
104 history records recorded at the time of UK Biobank entry, as well as hospital inpatient ICD-10 diagnoses and the  
105 Office of Population Censuses and Surveys Classification of Interventions and Procedures version 4 (OPCS-4)  
106 operative procedures occurring prior to the UK Biobank data as of 10<sup>th</sup> December 2019. Additional exposures  
107 examined included algorithmically derived end-stage renal disease (ESRD), measures of area-level residential air  
108 pollution, and Standard Occupational Classification (SOC)-2000 occupation-linked workplace airborne exposures  
109 as derived from the SOC codes and the Airborne Chemical Job Exposure Matrix (ACE JEM)<sup>15</sup>. Both CKD and Renal  
110 disease derived from Biobank fields f.41202 and f.41204. In addition to this, CKD defined using the ICD 10 code  
111 N18 – chronic kidney disease. Renal Disease was defined using the ICD codes N0\* and N1\* which includes renal  
112 disease but not limited to CKD. The source of each variable is provided in supplementary Table S1.

113 Given coeliac disease and type 1 diabetes mellitus classically share the same HLA class II alleles as primary MN,  
114 namely HLA-DQ2.5<sup>29–31</sup>, we investigated the incidence of these conditions in the UK biobank in relation to  
115 identified MN cases.

116 Residential linked air pollution estimates of particulate matter air pollutants with aerodynamic diameters <10µm  
117 (PM10) and <2.5µm (PM2.5 or fine PM), and gaseous air pollutions (Nitrogen Dioxide (NO<sub>2</sub>) and Nitrogen Oxide  
118 (NO)) were generated for 2010 using Land Use Regression (LUR) modelling as part of the European Study of

119 Cohorts and Air Pollution Effects (ESCAPE, <http://www.escapeproject.eu/>). Additional estimates for Nitrogen  
120 Dioxide were estimated for the years 2005-2007 from EU-wide air pollution maps (resolution 100 metre x 100  
121 metre) based in the LUR models, full details of the model and its performance can be found online<sup>16</sup>. All effect  
122 estimates related to associations with annual estimates of each air pollution were expressed per  $\mu\text{g}\text{m}^{-3}$ .

123 Where descriptive statistics have been produced, the median and interquartile range (IQR) have been reported  
124 for continuous measures and the proportion and percentages per category have been reported for categorical  
125 variables. Where data is missing, the number of cases with missing data is reported. In reporting disease  
126 incidence, the number of incident cases occurring post-UK Biobank entry has been divided by the total person-  
127 years of follow-up across the disease-free UK Biobank population until March 1<sup>st</sup> 2019, accounting for individual  
128 date of UK Biobank entry and recorded date of death if applicable. Baseline patients defined as those with a  
129 diagnosis of MN on study entry, 'Early Incident' defined as those diagnosed within five years after study entry,  
130 and 'Late Incident' defined as those patients diagnosed later than 5 years after study entry.

131 SNPs associated with MN were identified as the lead independent SNPs from 3 previous GWAS studies, referred  
132 to as GWAS1-3. Allele counts identified in GWAS1<sup>4</sup> were obtained from the directly genotyped Biobank dataset.  
133 Allele counts from GWAS2<sup>5</sup> and GWAS3<sup>6</sup> were obtained from the imputed Biobank dataset. Imputed genotypes  
134 were used as called regardless of any quality assessment.

135 Associations between dichotomous phenotypes and genotypes were assessed by determining the relative risk  
136 (RR) associated with each genotype compared to homozygous reference alleles, and the RR per allele (additive  
137 genetic model).

138 To determine univariate association between exposures of interest and MN diagnosis, generalised linear models  
139 were used with non-cases as the reference category. Results were presented as relative risk ratios (RR) with  
140 accompanying 95% Wald confidence intervals.

141 All statistical analyses were performed in R Version 3.5.1<sup>17</sup>. Plink v2.00 and BCFtools v1.10.2 were used to extract  
142 genetic data from the UK Biobank<sup>18-21</sup>.

143

## 144 Results

### 145 MN Incidence and Prevalence

146 A total of 502,507 patients were included in the study. Based on hospital admissions, 100 participants were  
147 found to have a putative diagnosis of MN as indicated by the ICD 10 codes, 36 at baseline and 64 occurring  
148 during the follow-up period. At baseline, the prevalence of MN in the Biobank population was 72 cases per  
149 million, with 199 cases per million at the latest follow up. There was a total of 64 incident cases, with N052  
150 contributing the largest number of patients at 31. With approximately 4.98 million total person-years of follow-  
151 up across the UK Biobank population, this corresponded to an incidence rate of 1.29 per 100,000 person-years,  
152 with a continued rise over time as the Biobank population ages. Table 1 and figure 1.

153

### 154 Demographics of MN cases

155 In the MN cohort, the median age at baseline assessment was 62 years old (IQR 56 – 65), compared to a median  
156 of 58 (IQR 50-63) in the non-MN group. There were 39% males in the MN cohort, compared to 54.4% males in  
157 the non-MN cohort. The majority of participants in the UK Biobank with and without MN were white, with  
158 similar BMI, smoking status, alcohol consumption and levels of deprivation as measured by the Townsend  
159 Deprivation Index and by the Index of Multiple Deprivation. Table 2.

160

### 161 Clinical

162 There was a higher level of proteinuria at baseline in the MN group compared to the non-MN group, with a  
163 median urinary albumin:creatinine ratio (uACR) of 3.0 mg/g (IQR 0.4-22.9) and 0.4 mg/g (IQR 0.4-0.6)  
164 respectively. Renal function at baseline was also lower in the MN group with a median estimated glomerular  
165 filtration rate (eGFR) 78.1ml/min/1.73m<sup>2</sup> (IQR 52.2-93.6), compared to the non-MN cohort who had a median  
166 eGFR 92.8ml/min/1.73m<sup>2</sup> (IQR 82.9-100.1). Table 3.

167 For those diagnosed with MN prior to study recruitment, a majority (66%; n=21) had proteinuria at baseline with  
168 a uACR of more than 3mg/g. 28% (n=9) had macro-albuminaemia with a uACR of more than 30mg/g. For those

169 diagnosed within 5 years of recruitment (early incident), there was already evidence of proteinuria at baseline,  
170 with 49% (n=17) having a uACR of more than 3mg/g, and 29% (n=10) with a uACR of more than 30mg/g. In the  
171 late incident group, diagnosed more than 5 years after recruitment, the majority had no evidence of proteinuria  
172 at baseline with 69% (n=18) having a uACR of less than 3mg/g. For this late incident group there was proteinuria  
173 noted at baseline in 31% (n=8) of patients (uACR greater than 3mg/g), and macro-albuminaemia in 15% (n=4)  
174 with a uACR of more than 30mg/g. Table 3.

175 Renal function for patients diagnosed prior to recruitment and in the early incident group, as measured by eGFR,  
176 was similar at baseline; median 74.3ml/min/1.73m<sup>2</sup> (IQR 46.8-86.7) in the baseline group, and median  
177 76.8ml/min/1.73m<sup>2</sup> (IQR 48.8-93.8) in the early incident group. In the late incident group, the median baseline  
178 eGFR was 92.9ml/min/1.73m<sup>2</sup> (IQR 76.3-95.0). Table 3.

179

## 180 Genetics

181 In the total population, we found that 73.4% (n=357,516) were homozygous for the low-risk *HLA-DQA1* alleles  
182 (CC) and 2.4% (n=11,622) patients were homozygous for the high-risk allele (TT). For *PLA2R1*, 35.8% (n=174,588)  
183 were homozygous for the high-risk alleles (AA) compared to 16.8% (n=81,861) homozygous for the low-risk GG  
184 alleles. Of these, 0.8% (n=4079) were found to have both high-risk allele SNPs. Tables S2 and S3.

185 We see similar results in the UK Biobank population as in the original GWAS with respect to risk of MN diagnosis.  
186 Compared to those homozygous for the low-risk *HLADQ* allele (C), being homozygous for the high-risk allele (T)  
187 was associated with an 8.79 times greater risk of MN diagnosis (RR: 9.79, 95% CI: 5.36-17.85). For *PLA2R1*,  
188 compared to those homozygous for the low-risk allele (G), being homozygous for the high-risk allele (A) was  
189 associated with a 1.22 times greater risk of MN (RR: 2.22, 95% CI: 1.16-4.25). Considering *HLADQ* and *PLA2R1* in  
190 combination, using the low-risk allele combination CCGG as the reference, the relative risk of MN for those  
191 homozygous for both SNPs was 23.44 (95% CI: 7.67-71.62). There was no increased risk of MN associated with  
192 being homozygous for either of the two novel lead SNPs identified in the most recent GWAS<sup>6</sup>. For *NFKB1*, the  
193 relative risk of MN among those homozygous for the high-risk allele was 1.08 (95% CI: 0.56-2.10); and for *IRF4*,  
194 the RR among those homozygous for the high-risk allele was 1.72 (95% CI: 0.62-4.75). Table 4 and Figure 2.



195 The highest incidence rate of MN was seen in those homozygous for the high-risk *HLA-DQA1* allele (TT) and high-  
196 risk *PLA2R1* allele (AA), with an incidence rate of 9.9 cases per 100,000 person-years. The lowest-risk group  
197 (CCGG) had an incidence rate of 0.5 cases per 100,000 person-years. Table 5.

198 Subgroup analysis comparing the cohorts homozygous for both the high-risk alleles for *HLA-DQA1* and *PLA2R1*  
199 (TT and AA respectively) with those not homozygous for both show a similar proportion of diabetes, both self-  
200 reported and through HES linkage. In the high-risk group, 2.8% of individuals self-reported having coeliac  
201 disease, and 3.2% were identified as having coeliac disease through HES linkage, this is compared to 0.4% and  
202 0.5% respectively, in the low-risk group. Table S4.

203 At baseline, there was no difference in eGFR in patients homozygous for the high-risk *HLA-DQA1* and *PLA2R1*  
204 alleles (TTAA) compared to those not. For uACR, the high-risk group showed weak association with a higher  
205 degree of proteinuria over 30 mg/g; 0.71% among those homozygous for TTAA, compared to 0.47% in those not  
206 homozygous for the high-risk alleles (not TTAA). Table S4.

207

208 Using patients with baseline proteinuria data, and homozygous for the low-risk allele for *HLA-DQA1* as reference,  
209 there was a weak negative association with mild or macro-albuminaemia for those homozygous for the high-  
210 risk alleles (TT); (RR: 0.94, 95% CI: 0.86-1.02). Patients homozygous for the high-risk *PLA2R1* allele (AA) were  
211 slightly more likely to have mild proteinuria (RR: 1.05, 95% CI: 1.01-1.08) and heavy proteinuria (RR: 1.11, 95%  
212 CI: 0.99-1.26), compared to the low-risk allele group (CC). Table S5.

213

## 214 Pollution and Work-Related Environmental Exposures

215 Univariate comparisons indicated no significant associations between increased environmental exposure to  
216 Nitrogen Dioxide, Nitrogen Oxides, or Particulate Matter and risk of MN diagnosis. Likewise, no significant  
217 associations were found between work-related environmental exposures and risk of MN diagnosis, though  
218 comparisons were subject to small sample sizes among those exposed with MN. Tables 6 and S6.

219 Primary care data

220 Data from primary care records was available for a subset of 228,957 (45.6%) participants. Of these, there were  
221 38 patients identified as putative MN cases using the previously defined READ codes. Using hospital admissions  
222 data, 41 patients in this subset were identified as having MN using the previously defined ICD codes. Of all  
223 identified patients with MN, 19 were identified in both sources, 19 only in primary care and 22 only through  
224 hospital admissions. For those patients identified in both sources, the majority were coded in both databases at  
225 the same time, but there were a number of patients with diagnoses in the primary care database for whom  
226 diagnosis was coded years in advance of hospital admission. The age distribution at first hospital admission was  
227 similar among patients included and not included in the primary care database. However, some of the primary  
228 care cases not identified by hospital admissions were diagnosed at a younger age. Supplementary figure S7.

## 229 Discussion

230 This is the first study to examine the occurrence and determinants of MN within the UK Biobank cohort. We  
231 have shown that putative MN cases can be identified at entry to the UK Biobank study as well as throughout  
232 follow-up. The incidence rate calculated here of 1.29 diagnoses per 100,000 person-years is similar to previously  
233 reported rates in other studies<sup>1,8,9,22–24</sup>. Most previous studies reporting incidence rates for MN are based on  
234 retrospective data from biopsies – a possibly unrepresentative cohort given the inherent suspicion of an  
235 underlying kidney disease. In contrast, the UK Biobank cohort is ostensibly a population-based sample (see Fry  
236 *et al* for consideration of the sample representativeness<sup>14</sup>), with this study being the first to evaluate MN  
237 occurrence in such a population.

238 At present MN remains a biopsy-diagnosed condition requiring specialist input, usually in a tertiary referral  
239 centre in the UK. The coding for MN in primary care records is therefore generally based on correspondence  
240 from a tertiary care centre, meaning patients assigned codes for MN are highly likely to have the condition  
241 (unpublished work). However, there is no unifying code for MN in either ICD-10 or READ codes, and those that  
242 are available include adjunctive diagnoses. This raises the possibility that patients with MN could be missed, as  
243 they have been coded with more generic descriptions of the condition such as nephrotic syndrome. A number  
244 of patients identified from primary care data were diagnosed prior to the initiation of HES and who do not,  
245 therefore, appear in the hospital admissions database at all, or who appear years later. It may be that some of  
246 these patients were already in remission before the commencement of HES data, and therefore were never  
247 captured. At present, the available HES data also does not capture outpatient episodes, meaning patients  
248 already diagnosed prior to the commencement of the database, will not be identified as they are only seen in  
249 the outpatient clinic setting and not as an inpatient. Patients in remission could appear in the HES database  
250 years after identification in the General Practitioner (GP) database, owing to a relapse necessitating admission  
251 to a specialist nephrology centre. An ongoing limitation with data linkage in the UK Biobank is the incomplete  
252 coverage of both primary care data and HES, although this is being continuously addressed and updated.

253 MN is a disease of middle to late age, with the median age at baseline here of 62 years old<sup>25,26</sup>. We found a  
254 female predominance for MN in the UK Biobank, which is in-keeping with autoimmune disease in general  
255 although not specifically in MN<sup>27</sup>. A number of studies in the past have shown the opposite is true with MN,

256 however, though this prior work has been inconsistent, emblematic of the difficulty of epidemiological studies  
257 in examining this rare disease<sup>1</sup>.

258 As expected, there was a higher degree of proteinuria and lower eGFR at baseline in our study in patients with  
259 MN compared to the non-MN cohort. Interestingly, those patients who had no diagnosis of MN at baseline but  
260 who went on to be diagnosed within 5 years already had evidence of subclinical biochemical abnormalities  
261 suggestive of MN. Almost half of these early incident patients had some degree of proteinuria and over a third  
262 had an eGFR of less than 60ml/min/1.73m<sup>2</sup>. These findings are similar to other recent studies<sup>28</sup>, and are  
263 indicative of the chronicity and slowly progressive nature of the disease, with patients experiencing ongoing  
264 pathogenic autoantibody production and glomerular damage years before it becomes clinically apparent.  
265 Identification of this prodromal cohort in the UK Biobank offers a unique opportunity to confirm the early role  
266 of anti-PLA<sub>2</sub>R in pathogenesis up to 5 years prior to clinical diagnosis of MN using the sera stored at study entry.  
267 It also allows testing of the hypothesis that infection could be the environmental trigger for MN by interrogation  
268 of the IgG antibody proteome library in early serum samples first positive for anti-PLA<sub>2</sub>R, in comparison to  
269 age/gender-matched controls. It may be possible to identify a unique IgG phenotype to infectious agents  
270 coincident with the onset of anti-PLA<sub>2</sub>R autoantibodies.

271 Currently 80% of autoimmune MN patients present with nephrotic syndrome without any prior indication of an  
272 underlying kidney disease, but with proteinuria and autoantibody production that may have been active for a  
273 variable period before this. Although the exact cause is still unknown, knowledge of the disease pathogenesis  
274 has increased markedly since the discovery of the anti-PLA<sub>2</sub>R autoantibody. There is undoubtedly a strong  
275 genetic component to autoimmune MN, with multiple GWAS initially identifying two genes, *HLA-DQA1* and  
276 *PLA2R1* in Europeans, and more recently *NFKB1* and *IRF4*, that all account for susceptibility to MN. Possession  
277 of homozygous pathological alleles of *HLA-DQA1* and *PLA2R1* raises the odds ratio from 1 to 78 for having the  
278 disease<sup>4</sup>. What is not known, is how likely it is for a patient to develop MN in the presence of these high-risk  
279 alleles. What is the lifetime risk of developing MN conferred by the high-risk alleles? Certainly, in our study, the  
280 relative risk of MN is significantly higher in patients homozygous for the *HLA-DQA1* and *PLA2R1* compared to  
281 those without any of the risk alleles (RR: 23.4, 95% CI: 7.7-71.6). Homozygosity of risk alleles in *HLA-DQA1* and  
282 *PLA2R1* resulted in a higher incidence of MN (9.9 cases per 100,000 person-years) and a higher degree of macro-  
283 albuminaemia. This suggests not only a higher incidence but also a more severe phenotype in keeping with

284 previous work showing an association of individuals with the *HLA-DQA1* risk alleles having higher anti-PLA2R  
285 antibodies<sup>26</sup>. There was a low penetrance with only 0.20% of patients homozygous for the high-risk alleles  
286 having, or developing MN, during the study follow-up, but as UK Biobank is a lifetime epidemiology study, the  
287 risk of developing MN will become evident. Given the chronicity of MN disease and its diagnosis late in life for  
288 most patients, this is a group of patients in whom active follow-up would be essential in order to determine the  
289 strength of genetics on the development of the disease.

290 We found no evidence for an increase in MN diagnosis in relation to particulate exposure or occupational  
291 exposures to heavy metals and hydrocarbons. This may be related to the much lower levels of exposure among  
292 patients in the UK compared to China, where this association was first described in biopsy patients<sup>8,9</sup>. In our  
293 cohort, the median level of exposure over the study period was 10.0 $\mu\text{g}\text{m}^{-3}$  for particulate matter of less than  
294 2.5 $\mu\text{m}$ , compared to a mean of 55.6 $\mu\text{g}\text{m}^{-3}$  (range 8.1 to 110.5) in China. Limitations to this comparison include  
295 the small numbers of exposed cases, lack of data on previous exposures, and the study population being  
296 generally more educated and from a higher socioeconomic background compared to the general population,  
297 and therefore potentially less likely to be exposed to higher pollution levels – all influencing the statistical power  
298 of environmental comparisons and our ability to detect plausible magnitude associations. A significantly larger  
299 study population would be required to investigate this further at lower particulate matter levels, and at present  
300 would be outside the remit of the UK Biobank.

301

302

303 Conclusion

304 Here we have shown for the first time that it is feasible to putatively identify patients with MN in the UK Biobank,  
305 both at study entry and over time, allowing for the use of this powerful resource to study initiation of a rare  
306 autoimmune disease in greater depth than previously possible, however definitive diagnosis would require  
307 participant or stored sample access. This study provides further evidence for the chronicity of disease with  
308 proteinuria present years prior to diagnosis in a number of patients. Genetics also plays an important role in  
309 the development of the disease although with low penetrance. Patients with the high-risk alleles provide an  
310 invaluable study population for prospective investigation of the disease process, this is particularly pertinent  
311 given the potential for missed cases in the database. This at-risk group would be an important sample for recall  
312 to interrogate further. Despite the low numbers of MN patients identified, this is the most comprehensive study  
313 of MN in a defined population to date. Importantly it also provides a baseline for further work to understand  
314 the pathogenesis of the disease as follow-up progresses.

315

316

317

318 Author Contributions

319 PB – project conception

320 PB, SR, DAK and PH – project protocol development

321 KB, SR and MG – data analysis

322 MLD, CV, HS, SG, SR - Genetic Analysis

323 PH – draft manuscript preparation

324 All authors – manuscript review

325

326

327 Acknowledgements

328 This was an approved study (I.D. 1618) by UK BioBank (<http://ukbiobank.org>). We acknowledge funding from

329 Kidney Research UK (KRUK) for the Stoneygate Foundation Grant JFS\_IN\_003\_20160914

330 MLD was supported by the KRESCENT post-doctoral fellowship from the Kidney Foundation of Canada

331

332

333 Disclosures

334 None

335

336

337

338

339

340

341

342 References

- 343 1. McGrogan A, Franssen CFM, Vries CS de. The incidence of primary glomerulonephritis worldwide: a systematic review of  
344 the literature. *Nephrol Dial Transpl.* 2011;26(2):414-430. doi:10.1093/ndt/gfq665
- 345 2. Beck L, Bonegio R, Lambeau G, et al. M-Type Phospholipase A2 Receptor as Target Antigen in Idiopathic Membranous  
346 Nephropathy. *N Engl J Med.* 2009;361(1):11-21. doi:10.1056/nejmoa0810457
- 347 3. Logt AE van de, Fresquet M, Wetzels JF, Brenchley P. The anti-PLA2R antibody in membranous nephropathy: what we  
348 know and what remains a decade after its discovery. *Kidney Int.* 2020;96(6):1292-1302. doi:10.1016/j.kint.2019.07.014
- 349 4. Stanescu H, Arcos-Burgos M, Medlar A, et al. Risk HLA-DQA1 and PLA2R1 alleles in idiopathic membranous nephropathy.  
350 *N Engl J Med.* 2011;364(7):616-626. doi:10.1056/nejmoa1009742
- 351 5. Sekula P, Li Y, Stanescu HC, et al. Genetic risk variants for membranous nephropathy: extension of and association with  
352 other chronic kidney disease aetiologies. *Nephrol Dial Transpl.* 2017;32(2):325-332. doi:10.1093/ndt/gfw001
- 353 6. Xie J, Liu L, Mladkova N, et al. The genetic architecture of membranous nephropathy and its potential to improve non-  
354 invasive diagnosis. *Nat Commun.* 2020;11(1):1600. doi:10.1038/s41467-020-15383-w
- 355 7. Fresquet M, Jowitt TA, Gummadova J, et al. Identification of a Major Epitope Recognized by PLA2R Autoantibodies in  
356 Primary Membranous Nephropathy. *J Am Soc Nephrol.* 2014;26(2):302-313. doi:10.1681/asn.2014050502
- 357 8. Li J, Cui Z, Long J, et al. Primary glomerular nephropathy among hospitalized patients in a national database in China.  
358 *Nephrol Dial Transpl.* Published online 2018. doi:10.1093/ndt/gfy022
- 359 9. Xu X, Wang G, Chen N, et al. Long-Term Exposure to Air Pollution and Increased Risk of Membranous Nephropathy in  
360 China. *J Am Soc Nephrol.* 2016;27(12):3739-3746. doi:10.1681/asn.2016010093
- 361 10. (HSCIC) H and SCIC. Hospital Episode Statistics. Accessed January 15, 2021. [https://digital.nhs.uk/data-and-](https://digital.nhs.uk/data-and-information/data-tools-and-services/data-services/hospital-episode-statistics#further-information)  
362 [information/data-tools-and-services/data-services/hospital-episode-statistics#further-information](https://digital.nhs.uk/data-and-information/data-tools-and-services/data-services/hospital-episode-statistics#further-information)
- 363 11. Elliott P, Peakman TC, Biobank U. The UK Biobank sample handling and storage protocol for the collection, processing  
364 and archiving of human blood and urine. *Int J Epidemiol.* 2008;37(2):234-244. doi:10.1093/ije/dym276
- 365 12. Ollier W, Sprosen T, Peakman T. UK Biobank: from concept to reality. *Pharmacogenomics.* 2005;6(6):639-646.  
366 doi:10.2217/14622416.6.6.639
- 367 13. Sudlow C, Gallacher J, Allen N, et al. UK Biobank: An Open Access Resource for Identifying the Causes of a Wide Range of  
368 Complex Diseases of Middle and Old Age. *Plos Med.* 2015;12(3):e1001779. doi:10.1371/journal.pmed.1001779
- 369 14. Fry A, Littlejohns TJ, Sudlow C, et al. Comparison of Sociodemographic and Health-Related Characteristics of UK Biobank  
370 Participants With Those of the General Population. *Am J Epidemiol.* 2017;186(9):1026-1034. doi:10.1093/aje/kwx246
- 371 15. Sadhra SS, Kurmi OP, Chambers H, Lam KBH, Fishwick D, Group TOCR. Development of an occupational airborne chemical  
372 exposure matrix. *Occup Med-c.* 2016;66(5):358-364. doi:10.1093/occmed/kqw027
- 373 16. Vienneau D, Hoogh K de, Bechle MJ, et al. Western European Land Use Regression Incorporating Satellite- and Ground-  
374 Based Measurements of NO<sub>2</sub> and PM<sub>10</sub>. *Environ Sci Technol.* 2013;47(23):13555-13564. doi:10.1021/es403089q
- 375 17. (2019) RCT. R: A Language and Environment for Statistical Computing.; 2019. <https://www.R-project.org/>
- 376 18. Purcell S, Chang C. PLINK 2.0. [www.cog-genomics.org/plink/2.0/](http://www.cog-genomics.org/plink/2.0/)
- 377 19. Chang CC, Chow CC, Tellier LC, Vattikuti S, Purcell SM, Lee JJ. Second-generation PLINK: rising to the challenge of larger  
378 and richer datasets. *Gigascience.* 2015;4(1):7. doi:10.1186/s13742-015-0047-8



- 379 20. Danecek P, Bonfield JK, Liddle J, et al. Twelve years of SAMtools and BCFtools. *Gigascience*. 2021;10(2):giab008.  
380 doi:10.1093/gigascience/giab008
- 381 21. Li H. A statistical framework for SNP calling, mutation discovery, association mapping and population genetical parameter  
382 estimation from sequencing data. *Bioinformatics*. 2011;27(21):2987-2993. doi:10.1093/bioinformatics/btr509
- 383 22. Hanco JB, Mullan RN, O'Rourke DM, McNamee PT, Maxwell AP, Courtney AE. The changing pattern of adult primary  
384 glomerular disease. *Nephrology Dialysis Transplantation*. 2009;24(10):3050-3054. doi:10.1093/ndt/gfp254
- 385 23. Swaminathan S, Leung N, Lager DJ, et al. Changing incidence of glomerular disease in Olmsted County, Minnesota: a 30-  
386 year renal biopsy study. *Clin J Am Soc Nephrol*. 2006;1(3):483-487. doi:10.2215/cjn.00710805
- 387 24. Tang L, Yao J, Kong X, et al. Increasing prevalence of membranous nephropathy in patients with primary glomerular  
388 diseases: A cross-sectional study in China. *Nephrology*. 2017;22(2):168-173. doi:10.1111/nep.12739
- 389 25. Floege J, Amann K. Primary glomerulonephritides. *The Lancet*. 2016;0(0). doi:10.1016/s0140-6736(16)00272-5
- 390 26. Kanigicherla D, Gummadova J, McKenzie EA, et al. Anti-PLA2R antibodies measured by ELISA predict long-term outcome  
391 in a prevalent population of patients with idiopathic membranous nephropathy. *Kidney Int*. 2013;83(5):940-948.  
392 doi:10.1038/ki.2012.486
- 393 27. Jacobson DL, Gange SJ, Rose NR, Graham NMH. Epidemiology and Estimated Population Burden of Selected Autoimmune  
394 Diseases in the United States. *Clin Immunol Immunop*. 1997;84(3):223-243. doi:10.1006/clin.1997.4412
- 395 28. Burbelo PD, Joshi M, Chaturvedi A, et al. Detection of PLA2R Autoantibodies before the Diagnosis of Membranous  
396 Nephropathy. *J Am Soc Nephrol*. 2019;31(1):208-217. doi:10.1681/asn.2019050538
- 397 29. Noble JA, Valdes AM. Genetics of the HLA region in the prediction of type 1 diabetes. *Curr Diab Rep*. 2011 Dec;11(6):533-  
398 42. doi: 10.1007/s11892-011-0223-x. PMID: 21912932; PMCID: PMC3233362.
- 399 30. Sollid, L. M. et al. Evidence for a primary association of celiac disease to a particular HLA-DQ alpha/beta heterodimer. *J*  
400 *Exp Medicine* 169, 345–350 (1989).
- 401 31. Lundin, K. E. et al. Gliadin-specific, HLA-DQ(alpha 1\*0501,beta 1\*0201) restricted T cells isolated from the small intestinal  
402 mucosa of celiac disease patients. *J Exp Medicine* 178, 187–196 (1993).
- 403

404 Supplementary Material Table of Contents (PDF)

405

406 Table S1 Biobank fields and variable definitions

407 Table S2 Allele counts at the lead SNPs from GWAS1<sup>4</sup>, GWAS2<sup>5</sup>, and GWAS3<sup>6</sup> in all UK Biobank  
408 participants using the imputed UK Biobank datasets

409 Table S3 Counts of genotype combinations at the lead SNPs from GWAS1<sup>4</sup> and GWAS2<sup>5</sup> in all UK  
410 Biobank participants using both the imputed UK Biobank datasets

411 Table S4 Phenotype per combined genotype group at HLADQA1 (rs2187668, test allele T) and PLA2R1  
412 (rs4664308, test allele A) from GWAS1<sup>4</sup> in all UK Biobank participants using the directly  
413 genotyped UK Biobank dataset

414 Table S5 Phenotype and genotype by degree of proteinuria for all UK Biobank participants, with  
415 genotypes obtained from the imputed UK Biobank dataset at the lead SNPs from GWAS1<sup>4</sup>  
416 and GWAS2<sup>5</sup>.

417 Table S6 Environmental exposures – work-related

418

419 Figure S7 A) Time difference from GP diagnosis to HES diagnosis where the case was identified in both  
420 sources.

421 B) Age distributions of the cases identified in the two sources

422 C) Date of diagnosis of the cases identified in the two sources

423

424 Figure Legends

425

426 **Figure 1:** Monthly cumulative incidence of MN. A) Cases identified each calendar month B) Kaplan-Meier  
427 estimate by age with 95%CI.

428 **Figure 2:** Genetic Risk of MN by PLA2R1 and HLADQ. Based on directly called SNPs determined in GWAS1<sup>4</sup>

429

430

| ICD10 | Description                                                                    | Cases Detected |                | Prevalence per million |                | Incident Cases | Incidence Rate<br>(per 100,000 person-years) |
|-------|--------------------------------------------------------------------------------|----------------|----------------|------------------------|----------------|----------------|----------------------------------------------|
|       |                                                                                | Baseline       | Last follow up | Baseline               | Last follow up |                |                                              |
| N022  | Recurrent and persistent haematuria with diffuse membranous glomerulonephritis | 5              | 35             | 10                     | 70             | 30             | 0.60                                         |
| N032  | Chronic nephritic syndrome with diffuse membranous glomerulonephritis          | 4              | 12             | 8                      | 24             | 8              | 0.16                                         |
| N042  | Nephrotic syndrome with diffuse membranous glomerulonephritis                  | 4              | 27             | 8                      | 54             | 23             | 0.46                                         |
| N052  | Unspecified nephritic syndrome with diffuse membranous glomerulonephritis      | 25             | 56             | 50                     | 111            | 31             | 0.62                                         |
| Total | Putative Membranous Nephropathy                                                | 36             | 100            | 72                     | 199            | 64             | 1.29                                         |

Table 1 – incidence and prevalence

| Characteristics                                  |                            | No MN                 | MN               |
|--------------------------------------------------|----------------------------|-----------------------|------------------|
| <i>N</i>                                         |                            | 502407                | 100              |
| Age at baseline assessment                       | Median [IQR]               | 58 [50-63]            | 62 [56-65]       |
| Age at last follow-up (death or end of HES data) | Median [IQR]               | 68 [60-73]            | 70 (65-74)       |
| Sex                                              | Male                       | 273345/502407 (54.4%) | 39/100 (39%)     |
|                                                  | Female                     | 229062/502407 (45.6%) | 61/100 (61%)     |
| Ethnicity                                        | White                      | 472608/501509 (94.2%) | 90/100 (90%)     |
|                                                  | Asian                      | 9877/501509 (2.0%)    | 5/100 (5%)       |
|                                                  | Black                      | 8059/501509 (1.6%)    | 2/100 (2%)       |
|                                                  | Mixed/Other                | 9087/501509 (1.8%)    | 3/100 (3%)       |
|                                                  | Not Known                  | 1878/501509 (0.4%)    | 0/100 (0%)       |
| BMI                                              | Median [IQR]               | 26.7 [24.1-29.9]      | 27.5 [24.5-30.7] |
|                                                  | NA                         | 3104                  | 1                |
| Smoking Status                                   | Prefer not to answer       | 2057/501516 (0.4%)    | 0/100 (0%)       |
|                                                  | Never                      | 273472/501516 (54.5%) | 50/100 (50%)     |
|                                                  | Previous                   | 173018/501516 (34.5%) | 40/100 (40%)     |
|                                                  | Current                    | 52969/501516 (10.6%)  | 10/100 (10%)     |
| Alcohol Consumption                              | Prefer not to answer       | 756/501510 (0.2%)     | 0/100 (0%)       |
|                                                  | Never                      | 22377/501510 (4.5%)   | 8/100 (8%)       |
|                                                  | Previous                   | 18102/501510 (3.6%)   | 2/100 (2%)       |
|                                                  | Current                    | 460275/501510 (91.8%) | 90/100 (90%)     |
| Alcohol Consumption Frequency                    | Prefer not to answer       | 604/501510 (0.1%)     | 0/100 (0%)       |
|                                                  | Daily or almost daily      | 101751/501510 (20.3%) | 18/100 (18%)     |
|                                                  | Three or four times a week | 115422/501510 (23.0%) | 18/100 (18%)     |
|                                                  | Once or twice a week       | 129265/501510 (25.8%) | 27/100 (27%)     |
|                                                  | One to three times a month | 55848/501510 (11.1%)  | 7/100 (7%)       |
|                                                  | Special occasions          | 57989/501510 (11.6%)  | 20/100 (20%)     |
|                                                  | Never                      | 40631/501510 (8.1%)   | 10/100 (10%)     |
| Townsend Deprivation Index                       | Median [IQR]               | -2.1 [-3.6-0.6]       | -1.9 [-3.9-0.5]  |
|                                                  | NA                         | 623                   | 0                |
| Index of Multiple Deprivation                    | Median [IQR]               | 12.8 [7.1-23.3]       | 16.5 [8.4-27.6]  |
|                                                  | NA                         | 12737                 | 0                |

Table 2 – Demographics for the UK Biobank population

|                                               | No MN               | MN                    |                  |                  |                  |                  |
|-----------------------------------------------|---------------------|-----------------------|------------------|------------------|------------------|------------------|
|                                               |                     | Any                   | Baseline         | Early Incident   | Late Incident    |                  |
|                                               | 502,407             | 100                   | 36               | 36               | 28               |                  |
| Self-reported Renal Failure                   | 872/502407 (0.2%)   | 12/100 (12%)          | 8/36 (22%)       | 4/36 (11%)       | 0/28 (0%)        |                  |
| HES CKD                                       | 9033/502407 (1.8%)  | 49/100 (49%)          | 16/36 (44.%)     | 20/36 (56%)      | 13/28 (46%)      |                  |
| HES Renal Disease                             | 21931/502407 (4.4%) | 100/100 (100%)        | 36/36 (100%)     | 36/36 (100%)     | 28/28 (100%)     |                  |
| Algorithmically derived ESRD                  | 1168/502407 (0.2%)  | 23/100 (23%)          | 8/36 (22%)       | 11/36 (31%)      | 4/28 (14%)       |                  |
| uACR at baseline (mg/g)                       | <3                  | 458536/484201 (94.7%) | 47/93 (50.5%)    | 11/32 (34%)      | 18/35 (51%)      | 18/26 (69%)      |
|                                               | 3-30                | 23405/484201 (4.8%)   | 23/93 (25%)      | 12/32 (38%)      | 7/35 (20%)       | 4/26 (15%)       |
|                                               | 30-250              | 2128/484201 (0.4%)    | 15/93 (16%)      | 7/32 (22%)       | 4/35 (11%)       | 4/26 (15%)       |
|                                               | >250                | 132/484201 (0.03%)    | 8/93 (8.6%)      | 2/32 (6%)        | 6/35 (17%)       | 0/26 (0%)        |
|                                               | Median (IQR)        | 0.4 (0.4-0.6)         | 3.0 (0.4-22.9)   | 7.2 (2.6-31.2)   | 1.9 (0.4-99.2)   | 0.6 (0.4-8.8)    |
|                                               | Unknown             | 18206                 | 7                | 4                | 1                | 2                |
| eGFR at baseline (ml/min/1.73m <sup>2</sup> ) | ≥90                 | 277341/468781 (59.2%) | 32/89 (36%)      | 6/31 (19.4%)     | 11/33 (33%)      | 15/25 (60.0%)    |
|                                               | 60-90               | 180729/468781 (38.6%) | 31/89 (35%)      | 13/31 (42%)      | 10/33 (30%)      | 8/25 (32%)       |
|                                               | 15-60               | 10571/468781 (2.3%)   | 24/89 (27%)      | 11/31 (36%)      | 11/33 (33%)      | 2/25 (8%)        |
|                                               | <15                 | 140/468781 (0.03%)    | 2/89 (2%)        | 1/31 (3%)        | 1/33 (3.0%)      | 0/25 (0%)        |
|                                               | Median (IQR)        | 92.8 (82.9-100.1)     | 78.1 (52.2-93.6) | 74.3 (46.8-86.7) | 76.8 (48.8-93.8) | 92.9 (76.3-95.0) |
|                                               | Unknown             | 33626                 | 11               | 5                | 3                | 3                |
| Self-reported Diabetes                        | 25468/502407 (5.1%) | 12/100 (12%)          | 5/36 (14%)       | 5/36 (14%)       | 2/28 (7.%)       |                  |
| HES Diabetes                                  | 31266/502407 (6.2%) | 17/100 (17%)          | 8/36 (22%)       | 6/36 (17%)       | 3/28 (11%)       |                  |
| Self-reported Coeliac Disease                 | 2049/502407 (0.4%)  | 0/100 (0%)            | 0/36 (0.)        | 0/36 (0%)        | 0/28 (0%)        |                  |
| HES Coeliac Disease                           | 2481/502407 (0.5%)  | 1/100 (1%)            | 1/36 (3%)        | 0/36 (0%)        | 0/28 (0%)        |                  |
| Self-reported Renal Biopsy                    | 129/502407 (0.03%)  | 3/100 (3%)            | 3/36 (8%)        | 0/36 (0%)        | 0/28 (0%)        |                  |
| OPCS Renal Biopsy                             | 288/413517 (0.07%)  | 6/100 (6%)            | 3/36 (8%)        | 2/36 (6%)        | 1/28 (4%)        |                  |

Table 3 – Phenotype per group. Relationship between baseline cases, all incident cases, and incident cases ≤5 years from baseline. MN = Membranous Nephropathy, HES = Hospital Episode Statistics, CKD = Chronic Kidney Disease, ESRD = End-Stage Renal Disease, ACR = urinary albumin:creatinine ratio, eGFR = estimated Glomerular Filtration Rate, IQR = Inter-Quartile Range, SD = Standard Deviation, OPCS = OPCS Classification of Interventions and Procedures. See supplementary material table 1 for biobank variable codes and sources. eGFR calculated at baseline, algorithmically derived ESRD assessed throughout follow up period.

|                                        |                                                 |                   | MN                | RR (95% CI)        | GWAS OR          |
|----------------------------------------|-------------------------------------------------|-------------------|-------------------|--------------------|------------------|
| GWAS1 <sup>4</sup>                     | HLADQA1<br>rs2187668                            | CC                | 44/357516 (0.01%) | 1                  |                  |
|                                        |                                                 | CT                | 39/118070 (0.03%) | 2.68 (1.74-4.13)   |                  |
|                                        |                                                 | TT                | 14/11622 (0.12%)  | 9.79 (5.36-17.85)  |                  |
|                                        |                                                 | OR Per allele     |                   | 3.11 (2.31-4.18)   | 4.32 (3.73-5.01) |
|                                        | PLA2R1<br>rs4664308                             | GG                | 11/81861 (0.01%)  | 1                  |                  |
|                                        |                                                 | AG                | 34/230759 (0.02%) | 1.10 (0.56-2.16)   |                  |
|                                        |                                                 | AA                | 52/174588 (0.03%) | 2.22 (1.16-4.25)   |                  |
|                                        |                                                 | OR Per allele     |                   | 1.66 (1.22-2.26)   | 2.28 (1.9--2.64) |
| GWAS2 <sup>5</sup>                     | HLADQA1<br>rs9272729                            | GG                | 44/351417 (0.01%) | 1                  |                  |
|                                        |                                                 | AG                | 41/117731 (0.04%) | 2.78 (1.82-4.26)   |                  |
|                                        |                                                 | AA                | 12/10747 (0.11%)  | 8.92 (4.71-16.88)  |                  |
|                                        |                                                 | OR Per allele     |                   | 2.99 (2.17-4.11)   | 6.86 (4.55-10.3) |
|                                        | PLA2R1<br>rs17830558                            | GG                | 22/138318 (0.02%) | 1                  |                  |
|                                        |                                                 | TG                | 40/228842 (0.02%) | 1.10 (0.65-1.85)   |                  |
|                                        |                                                 | TT                | 33/105620 (0.03%) | 1.96 (1.15-3.37)   |                  |
|                                        |                                                 | OR Per allele     |                   | 1.44 (1.08-1.90)   | 1.63 (1.23-2.15) |
| GWAS3 <sup>6</sup>                     | HLADRB1/DQ<br>A1<br>rs9271573                   | CC                | 24/170192 (0.01%) | 1                  |                  |
|                                        |                                                 | AC                | 41/234411 (0.02%) | 1.24 (0.75-2.05)   |                  |
|                                        |                                                 | AA                | 32/82375 (0.04%)  | 2.75 (1.62-4.68)   |                  |
|                                        |                                                 | OR per allele     |                   | 1.70 (1.28-2.25)   | 2.41 (2.26-2.57) |
|                                        | PLA2R1<br>rs17831251                            | TT                | 11/80771 (0.014%) | 1                  |                  |
|                                        |                                                 | CT                | 33/227843 (0.01%) | 1.06 (0.54-2.10)   |                  |
|                                        |                                                 | CC                | 51/172495 (0.03%) | 2.17 (1.13-4.16)   |                  |
|                                        |                                                 | OR per allele     |                   | 1.67 (1.22-2.28)   | 2.25 (2.09-2.42) |
|                                        | NFKB1<br>rs230540                               | CC                | 11/59492 (0.02%)  | 1                  |                  |
|                                        |                                                 | CT                | 43/216576 (0.02%) | 1.07 (0.55-2.08)   |                  |
|                                        |                                                 | TT                | 41/205265 (0.02%) | 1.08 (0.56-2.10)   |                  |
|                                        |                                                 | OR per allele     |                   | 0.97 (0.72-1.31)   | 1.25 (1.17-1.33) |
| IRF4<br>rs9405192                      | AA                                              | 4/33043 (0.01%)   | 1                 |                    |                  |
|                                        | GA                                              | 39/182247 (0.02%) | 1.77 (0.63-4.95)  |                    |                  |
|                                        | GG                                              | 54/259096 (0.02%) | 1.72 (0.62-4.75)  |                    |                  |
|                                        | OR per allele                                   |                   | 0.90 (0.65-1.25)  | 1.29 (1.21-1.37)   |                  |
| GWAS1 <sup>4</sup><br>SNP Combinations | HLADQA1<br>rs2187668<br><br>PLA2R1<br>rs4664308 | CCGG              | 5/59756 (0.01%)   | 1                  |                  |
|                                        |                                                 | CCAG              | 17/168473 (0.01%) | 1.21 (0.44-3.27)   |                  |
|                                        |                                                 | CCAA              | 22/129287 (0.02%) | 2.03 (0.77-5.37)   |                  |
|                                        |                                                 | CTGG              | 4/20131 (0.02%)   | 2.37 (0.64-8.84)   |                  |
|                                        |                                                 | CTAG              | 13/56717 (0.02%)  | 2.74 (0.98-7.68)   |                  |
|                                        |                                                 | CTAA              | 22/41222 (0.05%)  | 6.38 (2.42-16.84)  |                  |
|                                        |                                                 | TTAG              | 4/5569 (0.07%)    | 8.58 (2.31-31.96)  |                  |
|                                        |                                                 | TTGG              | 2/1974 (0.10%)    | 12.11 (2.35-62.37) |                  |
| GWAS1 <sup>4</sup><br>Risk Groups      | Low Risk                                        | CCGG              | 5/59756 (0.01%)   | 1                  |                  |
|                                        | Medium Risk                                     | All else          | 84/423373 (0.02%) | 2.37 (0.96-5.85)   |                  |
|                                        | High Risk                                       | TTAA              | 8/4079 (0.20%)    | 23.44 (7.67-71.62) |                  |
| GWAS1 <sup>4</sup><br>PLA2R1 Groups    | No PLA2R1<br>allele                             | CCGG, CTGG, TTGG  | 11/81861 (0.01%)  | 1                  |                  |
|                                        | PLA2R1 Allele                                   | All Else          | 86/405347 (0.02%) | 1.58 (0.84-2.96)   |                  |

Table 4 – Genetic risk analysis in the membranous nephropathy cohort using the lead SNPs from GWAS1<sup>4</sup>, GWAS2<sup>5</sup> and GWAS3<sup>6</sup> from the imputed UK Biobank dataset. *MN* - Membranous Nephropathy, *RR* - Relative Risk, *CI* - Confidence Interval, *GWAS* - Genome-wide Association Study, *OR* - Odds Ratio, *SNP* - Single Nucleotide Polymorphism

| Genotype Groups                              |                                     | MN Prevalence |                | Incident Cases | Total Follow-up<br>(in 100,000 years) | Incidence Rate<br>(per 100,000 years) |
|----------------------------------------------|-------------------------------------|---------------|----------------|----------------|---------------------------------------|---------------------------------------|
|                                              |                                     | Baseline      | Last follow up |                |                                       |                                       |
| GWAS1 HLADQA1 and<br>PLA2R1 SNP Combinations | CCGG                                | 2             | 5              | 3              | 5.92                                  | 0.5                                   |
|                                              | CTGG                                | 1             | 4              | 3              | 2.00                                  | 1.5                                   |
|                                              | TTGG                                | 0             | 2              | 2              | 2.00                                  | 10.2                                  |
|                                              | CCAG                                | 5             | 17             | 12             | 16.68                                 | 0.7                                   |
|                                              | CTAG                                | 5             | 13             | 8              | 5.62                                  | 1.4                                   |
|                                              | TTAG                                | 1             | 4              | 3              | 0.55                                  | 5.5                                   |
|                                              | CCAA                                | 4             | 22             | 18             | 12.77                                 | 1.4                                   |
|                                              | CTAA                                | 13            | 22             | 9              | 4.08                                  | 2.2                                   |
|                                              | TTAA                                | 4             | 8              | 4              | 0.40                                  | 9.9                                   |
|                                              | Unknown HLADQ or PLA2R1             | 1             | 3              | 2              | 1.60                                  | 1.3                                   |
| Risk Groups                                  | Low Risk (CCGG)                     | 2             | 5              | 3              | 5.92                                  | 0.5                                   |
|                                              | Medium Risk (All Else)              | 29            | 84             | 55             | 41.88                                 | 1.3                                   |
|                                              | High Risk (TTAA)                    | 4             | 8              | 4              | 0.40                                  | 9.9                                   |
| PLA2R1 Allele Groups                         | No PLA2R1 Allele (CCGG, CTGG, TTGG) | 3             | 11             | 8              | 8.11                                  | 1.0                                   |
|                                              | PLA2R1 Allele (All Else)            | 32            | 86             | 54             | 40.10                                 | 1.3                                   |

Table 5 - Prevalence and incidence measures for: those in high-risk and low-risk groups; those with a PLA2R1 allele and without a PLA2R1 allele



| Pollution Metric                       |        | No MN               | MN                  | RR (95% CI)      |
|----------------------------------------|--------|---------------------|---------------------|------------------|
|                                        |        | Median [IQR]        | Median [IQR]        |                  |
| Nitrogen Dioxide                       | 2005   | 28.4 [23.1-34.7]    | 28.9 [24.2-36.6]    | 1.01 (0.99-1.03) |
|                                        | 2006   | 27.9 [22.8-33.3]    | 28.4 [23.7-35.2]    | 1.01 (0.99-1.03) |
|                                        | 2007   | 28.9 [23.6-35.0]    | 30.3 [24.5-36.7]    | 1.01 (0.99-1.03) |
|                                        | 2010   | 26.2 [21.5-31.3]    | 26.4 [21.8-30.9]    | 1.01 (0.98-1.03) |
| Nitrogen Oxides                        | 2010   | 42.4 [34.4-50.8]    | 42.9 [34.6-51.2]    | 1.00 (0.99-1.01) |
| Particulate Matter                     | <2.5um | 9.9 [9.3-10.6]      | 10.0 [9.5-10.5]     | 1.02 (0.84-1.23) |
|                                        | <10um  | 16.0 [15.2-17.0]    | 16.1 [15.4-16.8]    | 0.98 (0.88-1.09) |
| Distance to main road (per 100 metres) |        | 377.4 [166.9-751.9] | 378.8 [228.6-711.8] | 0.98 [0.95-1.02] |

Table 6 - Associations with environmental exposures presented in  $\mu\text{g}\text{m}^{-3}$ . pollution exposure: Identified MN cases versus controls with no diagnosed MN

**A**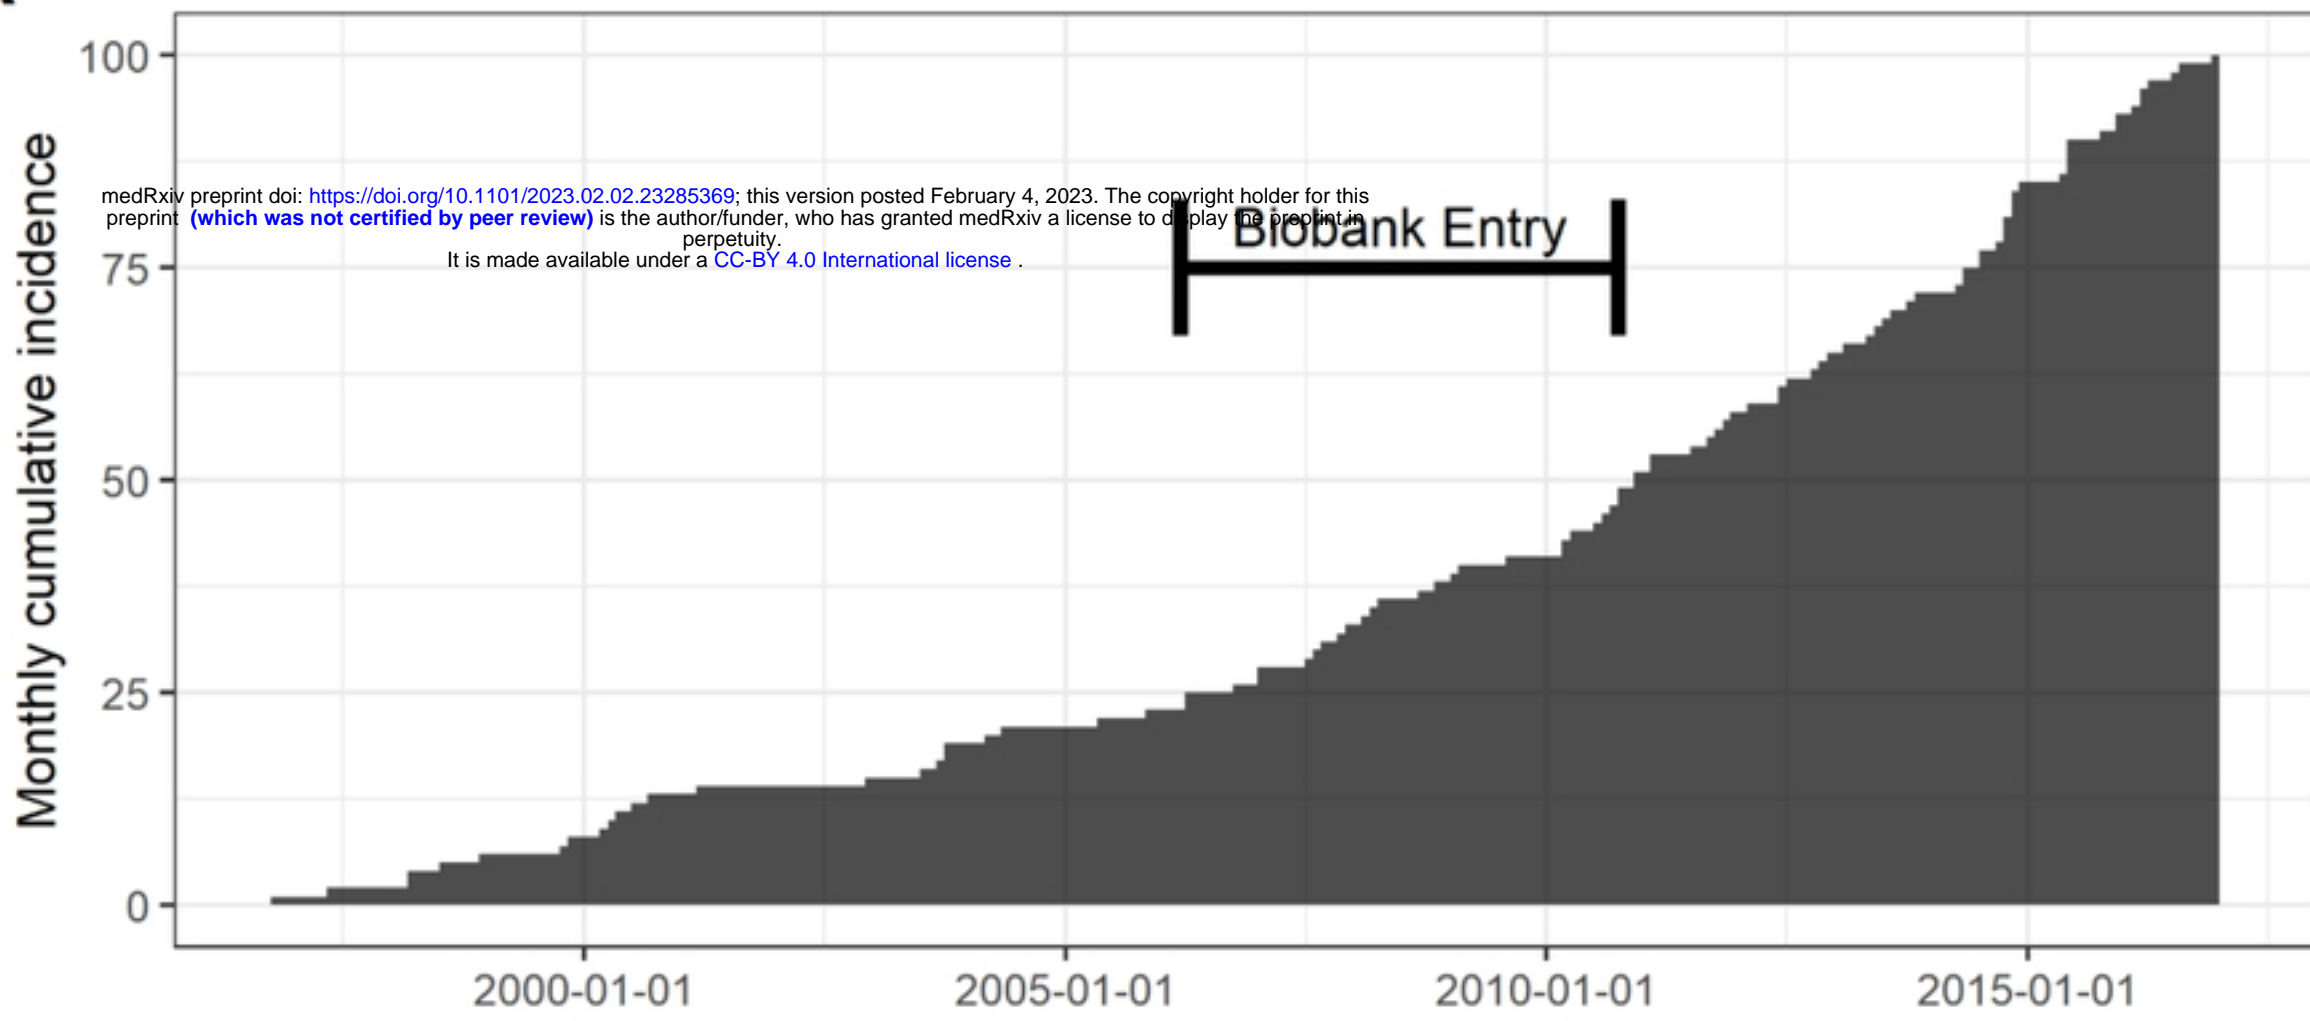**B**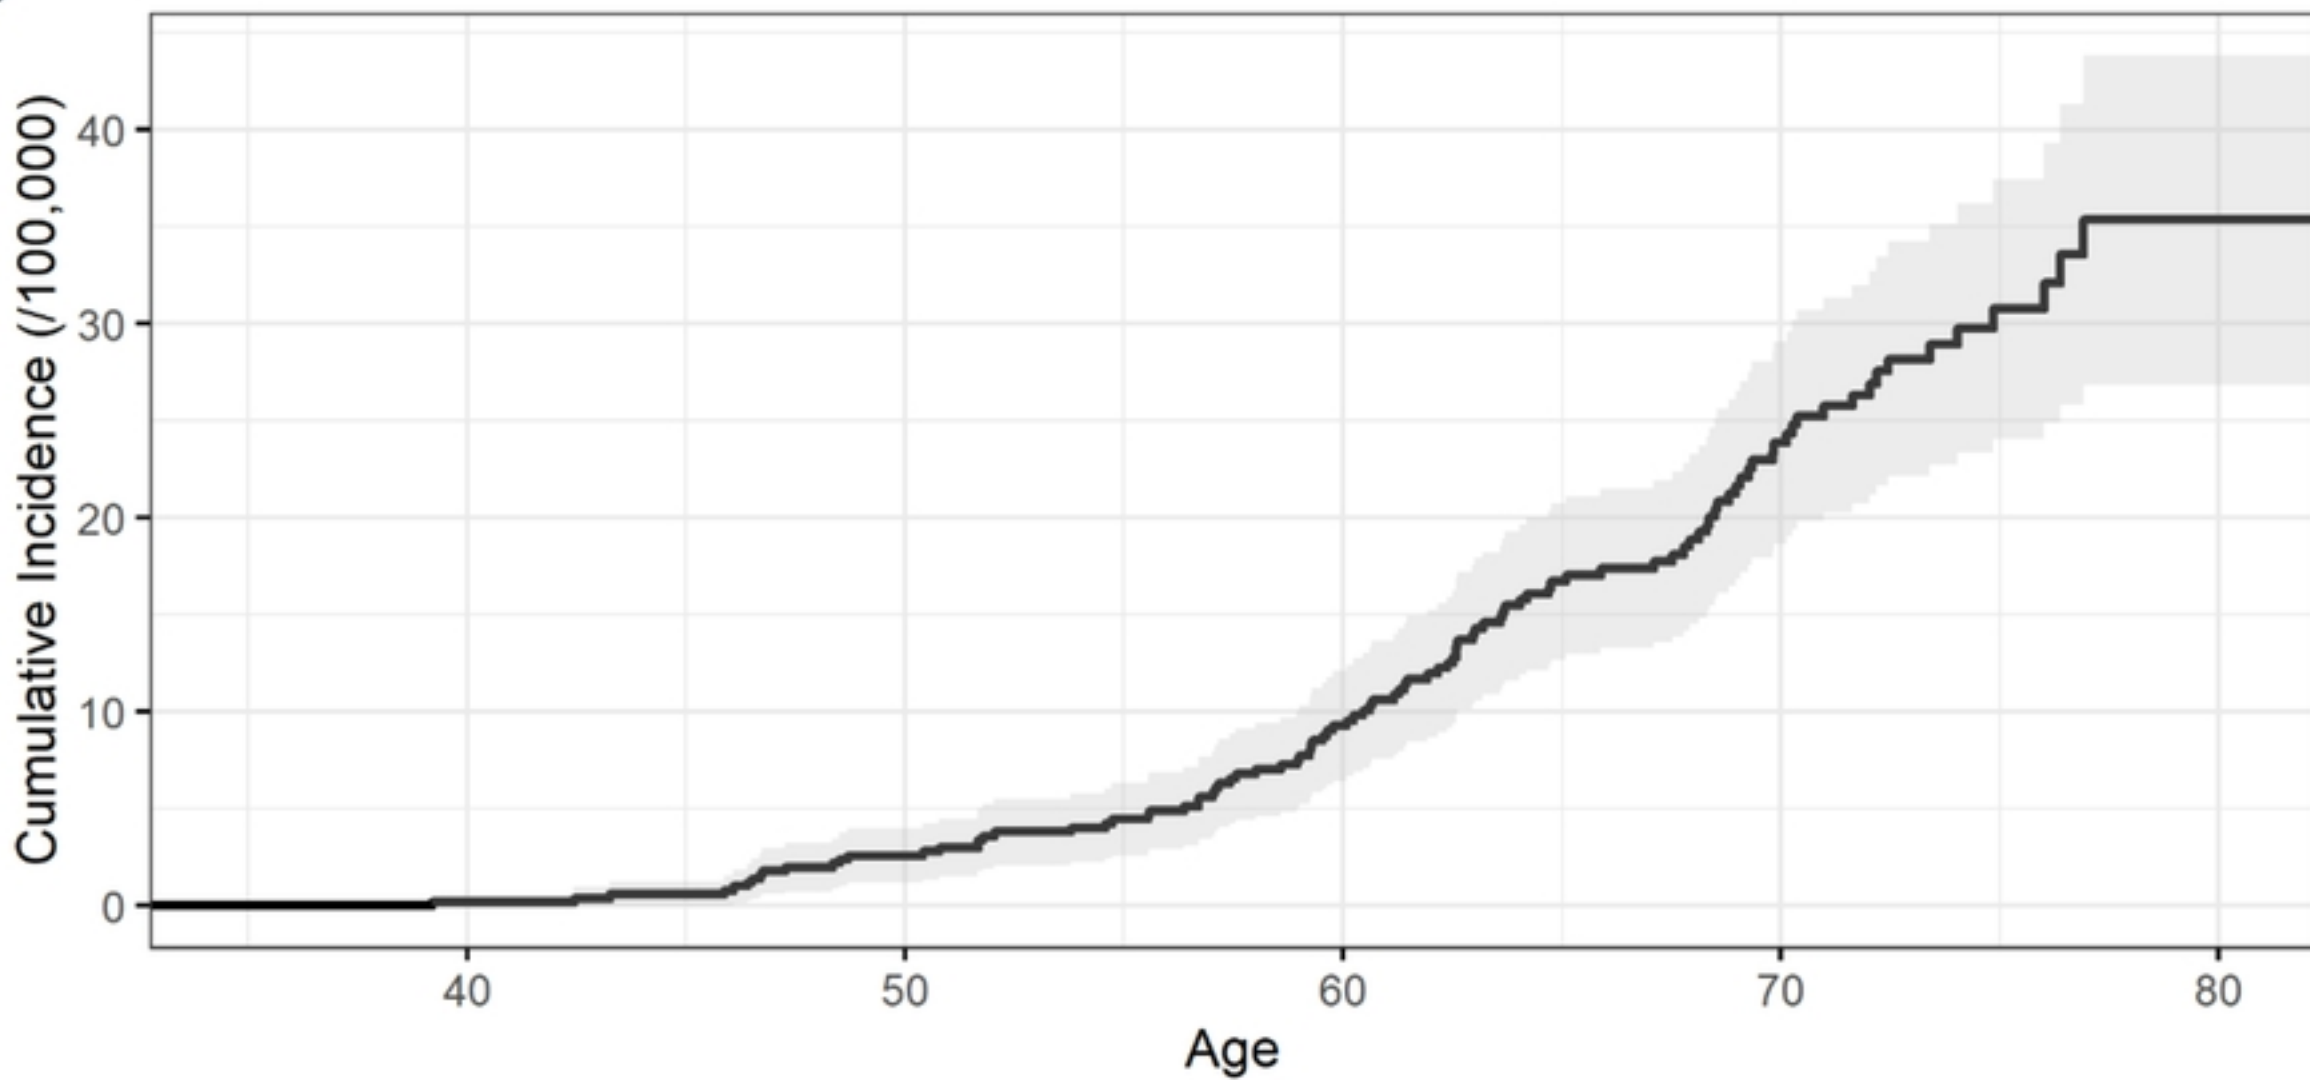**Figure 1**

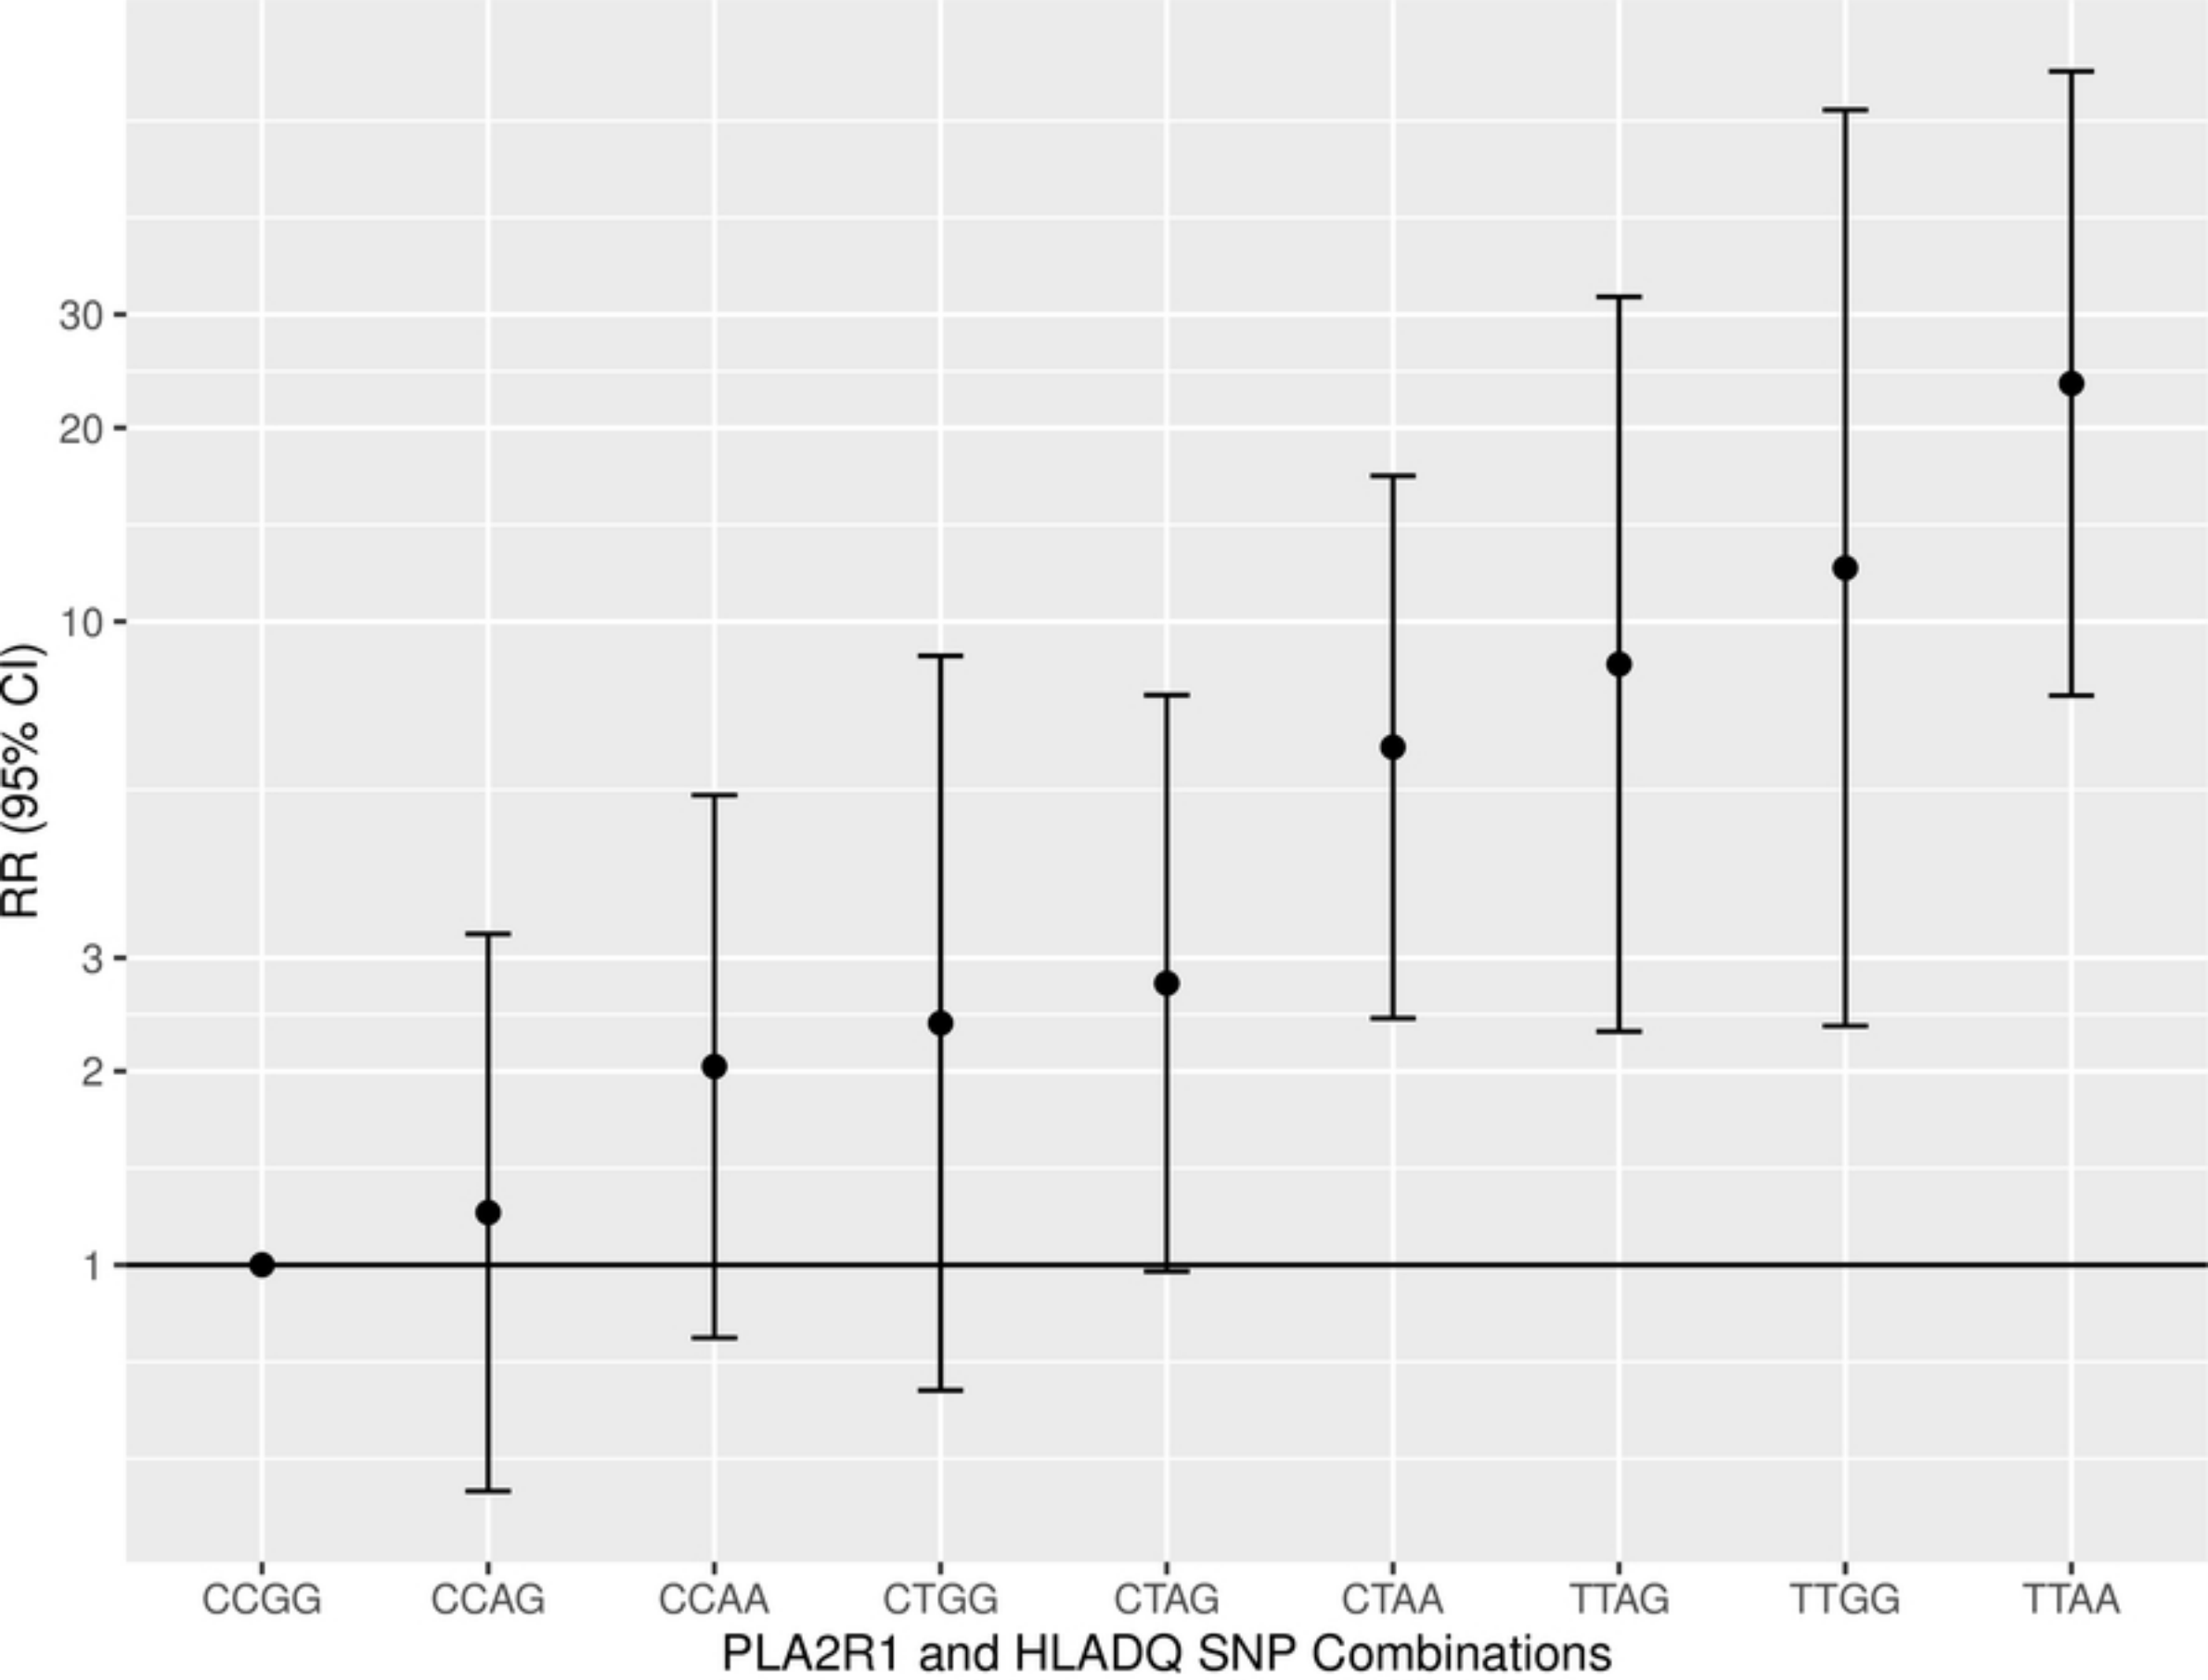

Figure 2
